# Supplementary material
Source: PubMed Central journal article supplement (PMC6932863)
Supplement: NIHMS1533336-supplement-1.pdf [file NIHMS1533336-supplement-1.pdf]

|                                                                 | WML       | 0-2mm<br>penumbra | 2-4mm<br>penumbra | NAWM             |
|-----------------------------------------------------------------|-----------|-------------------|-------------------|------------------|
| mean #voxels in<br>ROI (SD)                                     | 774 (883) | 2,919 (2,371)     | 6,087 (4,412)     | 228,761 (38,395) |
| mean #voxels for<br>VR                                          | 229 (322) | 1,075 (1,253)     | 2,258 (2,736)     | 131,654 (66,139) |
| n with #voxels for<br>VR above 20th<br>percentile of all<br>ROI | 223       | 377               | 425               | 456              |
| n with >20% of<br>ROI voxels used<br>for VR calculation         | 260       | 324               | 361               | 399              |
| n with both (%)                                                 | 187 (40)  | 315 (68)          | 358 (77)          | 399 (86)         |

Supplemental Table 1: VR data is obtained from a subset of ROI voxels. 20<sup>th</sup> percentile, corresponding to a total of 123 activated voxels) was calculated from all 4 ROI from all subjects. The majority of voxels below this threshold were in WML. The majority of subjects have either a low number of voxels used for VR calculation or a low percent of total voxels contributing to the VR calculation.

|       | WML          |             |               | 0-2mm Penumbra |              |              | 2-4mm Penumbra |              |              |
|-------|--------------|-------------|---------------|----------------|--------------|--------------|----------------|--------------|--------------|
|       | Coefficient  | SE          | p value       | Coefficient    | SE           | p value      | Coefficient    | SE           | p value      |
| T1    | -0.0009      | 0.021       | NS            | 0.47           | 0.019        | NS           | 0.053          | 0.015        | NS           |
| T2    | 0.034        | 0.021       | NS            | 0.12           | 0.016        | NS           | 0.0062         | 0.011        | NS           |
| FLAIR | 0.012        | 0.015       | NS            | 0.0098         | 0.06         | NS           | 0.086          | 0.00         | NS           |
| CBF   | <b>-0.15</b> | <b>0.48</b> | <b>0.0003</b> | <b>-0.13</b>   | <b>0.042</b> | <b>0.042</b> | <b>-0.012</b>  | <b>0.040</b> | <b>0.002</b> |
| FA    | 0.0155       | 0.047       | NS            | 0.0043         | 0.34         | NS           | 0.039          | 0.32         | NS           |
| MD    | 0.032        | 0.050       | NS            | 0.012          | 0.033        | NS           | 0.0003         | 0.026        | NS           |
| VR    | -0.014       | 0.061       | NS            | 0.046          | 0.047        | NS           | 0.073          | 0.040        | 0.07         |

Supplemental Table 2: Ordinary least squares modeling for associations between imaging parameters and number of cardiovascular risk factors (RFscore), adjusting for site, age, gender, and race. Only CBF shows significant associations with RFscore. Values are coefficient  $\pm$  standard error with unadjusted p values.

| WML |             |       |         |             |      |         |             |       |         |
|-----|-------------|-------|---------|-------------|------|---------|-------------|-------|---------|
|     | Smoking     |       |         | BMI         |      |         | Sedentary   |       |         |
|     | Coefficient | SE    | p value | Coefficient | SE   | p value | Coefficient | SE    | p value |
| T1  | —           | —     | NS      | —           | —    | NS      | -0.0422     | 0.021 | 0.045   |
| T2  | —           | —     | NS      | —           | —    | NS      | 0.0523      | 0.02  | 0.013   |
| CBF | -0.2343     | 0.097 | 0.016   | -0.124      | 0.05 | 0.013   | —           | —     | NS      |

|                |             |       |         |             |       |         |             |      |         |
|----------------|-------------|-------|---------|-------------|-------|---------|-------------|------|---------|
| VR             | -0.2606     | 0.123 | NS      | —           | —     | NS      | —           | —    | NS      |
| 0-2mm Penumbra |             |       |         |             |       |         |             |      |         |
|                | Smoking     |       |         | BMI         |       |         |             |      |         |
|                | Coefficient | SE    | p value | Coefficient | SE    | p value |             |      |         |
| T1             | 0.0829      | 0.038 | 0.028   | —           | —     | NS      |             |      |         |
| CBF            | —           | —     | NS      | -0.1327     | 0.043 | 0.002   |             |      |         |
| MD             | -0.1367     | 0.068 | 0.044   | —           | —     | NS      |             |      |         |
| 2-4mm Penumbra |             |       |         |             |       |         |             |      |         |
|                | Smoking     |       |         | BMI         |       |         | Sedentary   |      |         |
|                | Coefficient | SE    | p value | Coefficient | SE    | p value | Coefficient | SE   | p value |
| T1             | 0.0723      | 0.029 | 0.014   | —           | —     | NS      | —           | —    | NS      |
| CBF            | —           | —     | NS      | -0.1398     | 0.041 | 0.001   | —           | —    | NS      |
| MD             | -0.1331     | 0.052 | 0.011   | —           | —     | NS      | —           | —    | NS      |
| VR             | —           | —     | NS      | —           | —     | NS      | 0.0948      | 0.04 | 0.018   |

Supplemental Table 3: Ordinary least squares modeling for associations between imaging parameters (mean T1, T2, FLAIR, MD, FA, CBF, and VR) and individual cardiovascular risk factors: hypertension, hypercholesterolemia, diabetes, BMI, sedentary behavior, and smoking history. Models were adjusted for site, age, gender, and race. Only significant parameters from the models are shown; coefficients for all other parameters and risk factors were not significant and are not shown.

Supplemental Figure 1: Only subjects with all MRI parameters available are included for analysis. CBF data from one CARDIA study site were technically inadequate and could not be processed, leading to the largest exclusion of subjects.

Supplemental Figure 2: Box plots of mean percent change of vascular reactivity for each region, with outliers included.

Supplemental Figure 3: Cross validation scores as a function of number of feature selected.

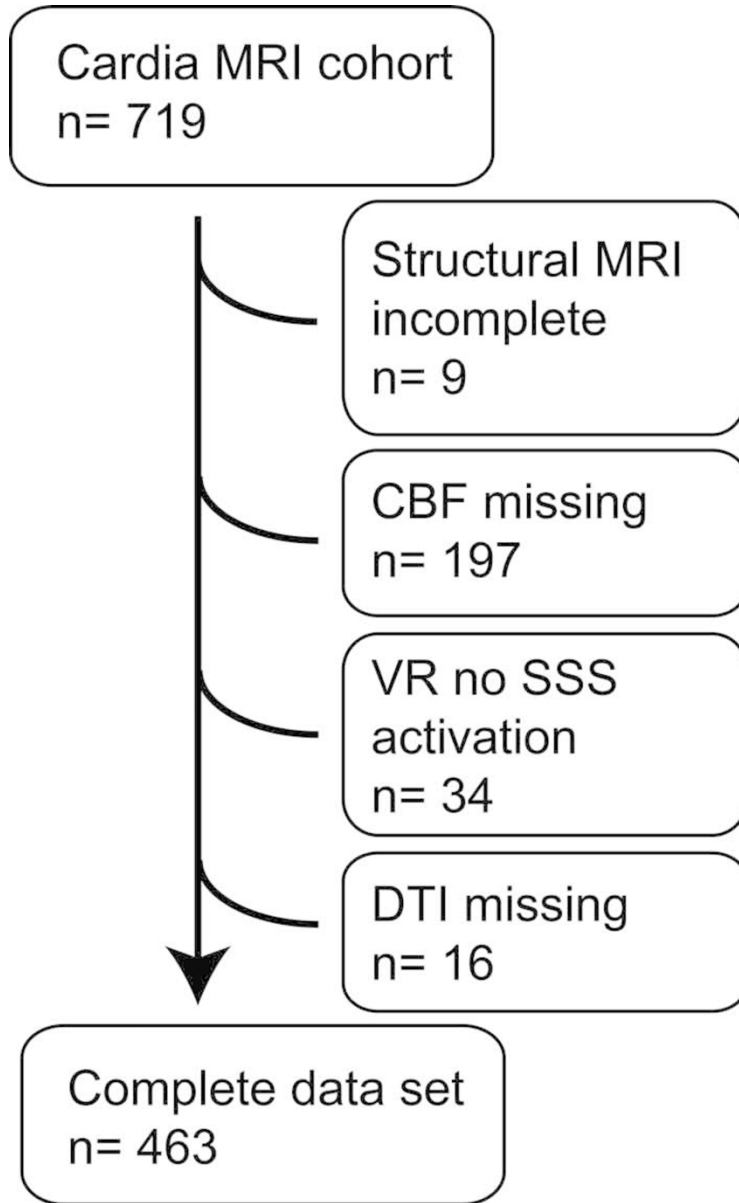

Supplemental figure 2 TIFF

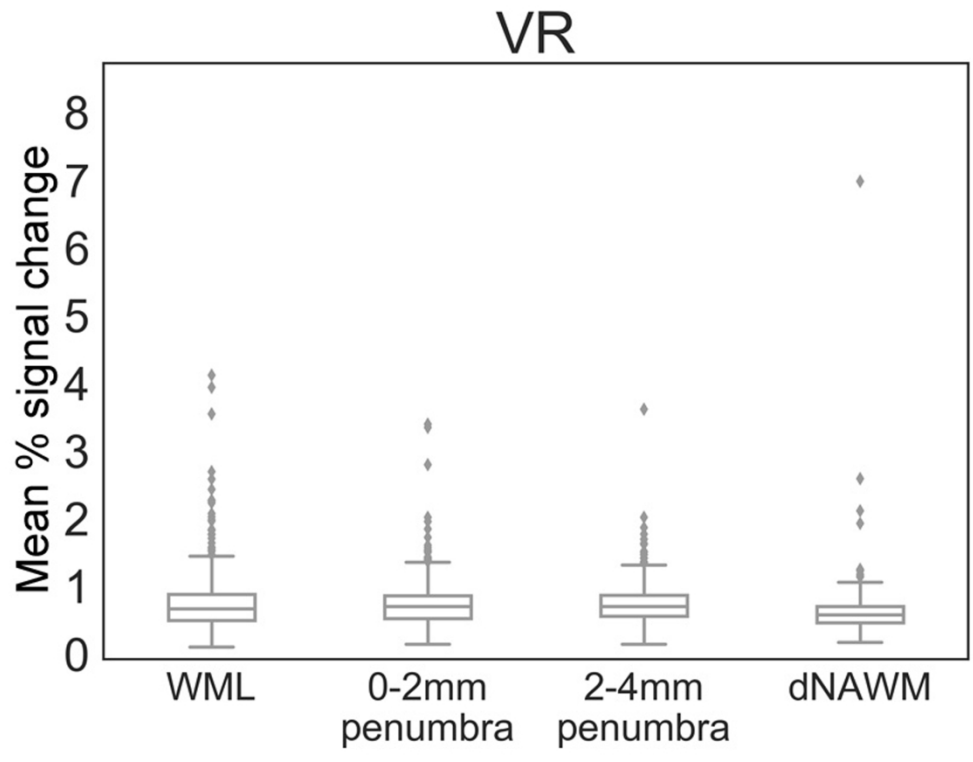

Supplemental figure 2 TIFF

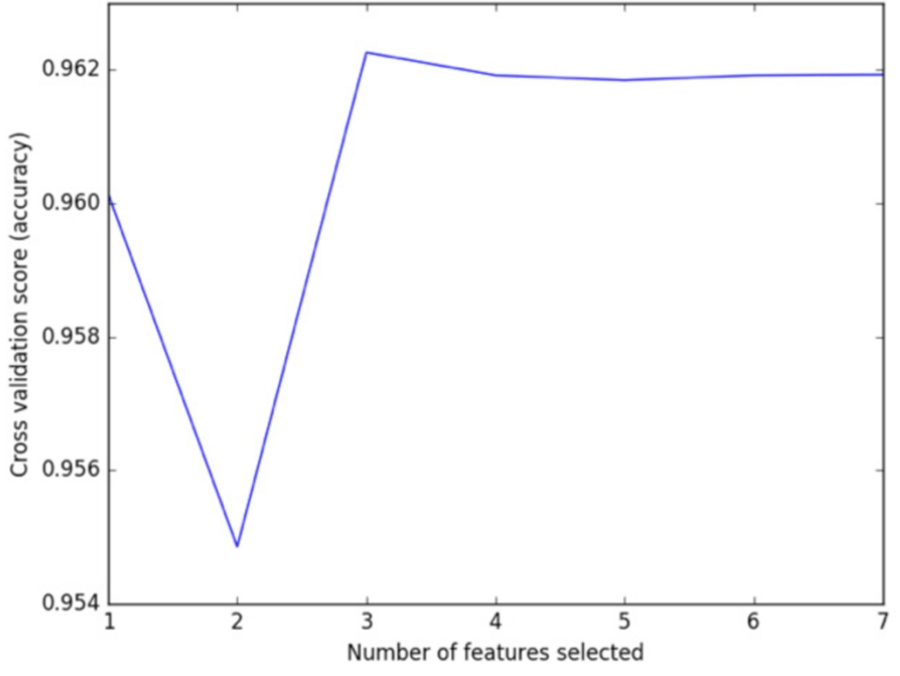

Supplemental figure 3 TIFF
